# Supplementary material
Source: PubMed Central journal article supplement (PMC3517145)
Supplement: NIHMS411621-supplement-supplement_1.pdf [file NIHMS411621-supplement-supplement_1.pdf]

A

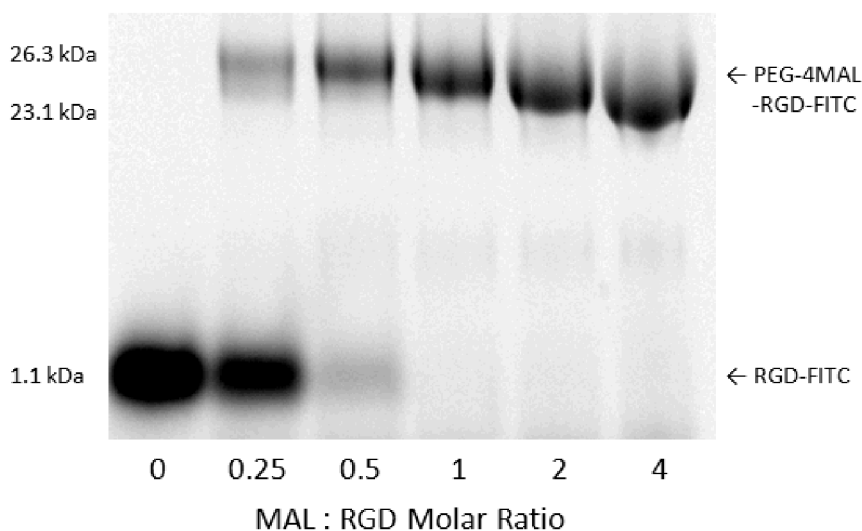

B

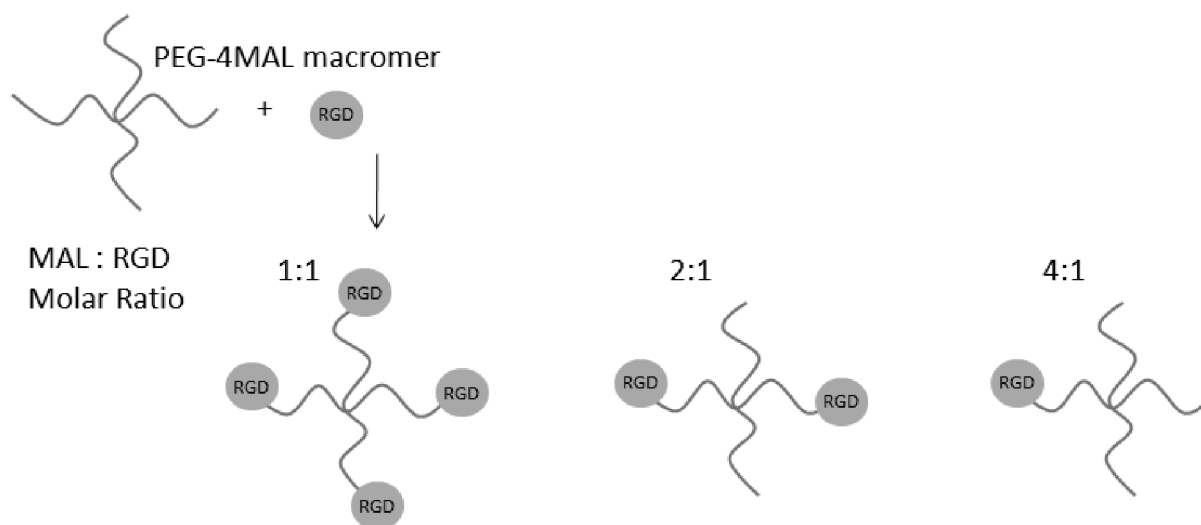

**Supplemental Figure 1.** PEG-4MAL reacted with GRGSPC-Fluorescein at increasing PEG-4MAL to RGD molar ratios. A) Increased molecular weight seen by SDS-PAGE indicates RGD conjugated to 4-arm PEG. B) Lower MAL:RGD molar ratios with excess RGD (ex: 1:1) result in multiple RGD conjugations per 4-arm PEG compared to reactions with excess MAL (ex 4:1) have only 1 RGD conjugated per PEG.

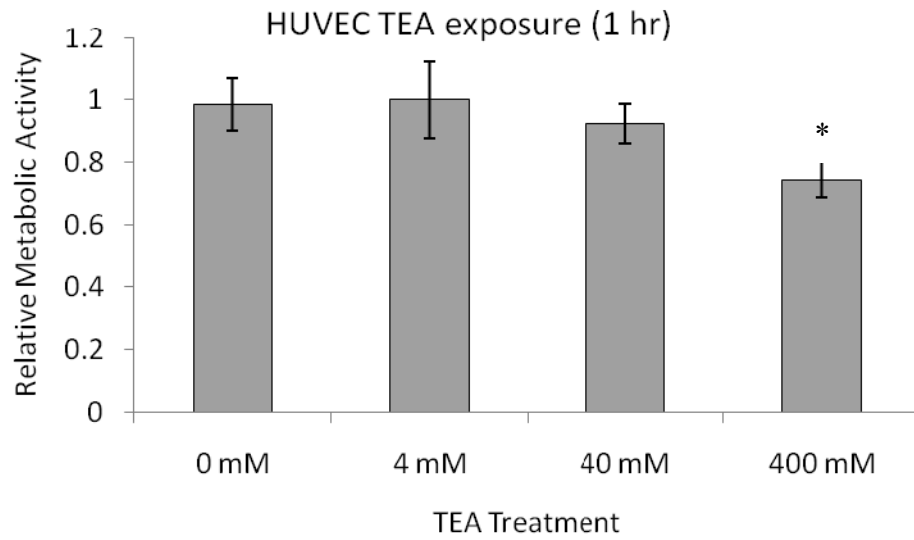

**Supplemental Figure 2.** HUVEC exposed to concentrations of TEA in EGM-2 media pH 7.4 for 1 hour at followed by MTS assay for metabolism and viability.
